# Supplementary material
Source: publisher figshare collection journal article supplement (https://acs.figshare.com/ndownloader/files/5681958)
Supplement: Supplementary file 1 [file 5681958]

## Supporting Information

for

# "Synthesis and Characterization of a Pt<sub>3</sub>Ru<sub>1</sub>/Vulcan Carbon Powder Nanocomposite and Reactivity as a Methanol Electrooxidation Catalyst"

Joshua T. Moore, James D. Corn, Deryn Chu, Rongzhong Jiang, Deborah L. Boxall, Edward A. Kenik, and C. M. Lukehart\*

Figure 1. A drawing of the molecular structure of the precursor complex, [Ru(dpq)<sub>3</sub>(PtCl<sub>2</sub>)<sub>3</sub>](BF<sub>4</sub>)<sub>2</sub>, 1a.

Figure 2. A UV-Vis absorption spectrum of a 4.04 x 10<sup>-4</sup> M solution of the precursor complex, [Ru(dpq)<sub>3</sub>(PtCl<sub>2</sub>)<sub>3</sub>](BF<sub>4</sub>)<sub>2</sub>, 1a, in acetonitrile, as recorded on a HP Agilent Model 8453 Photodiode Spectrophotometer with solvent subtraction.

Figure 3. A UV-Vis absorption spectrum of a 4.97 x 10<sup>-5</sup> M solution of the reagent complex, Pt(DMSO)<sub>2</sub>Cl<sub>2</sub>, in acetonitrile, as recorded on a HP Agilent Model 8453 Photodiode Spectrophotometer with solvent subtraction.

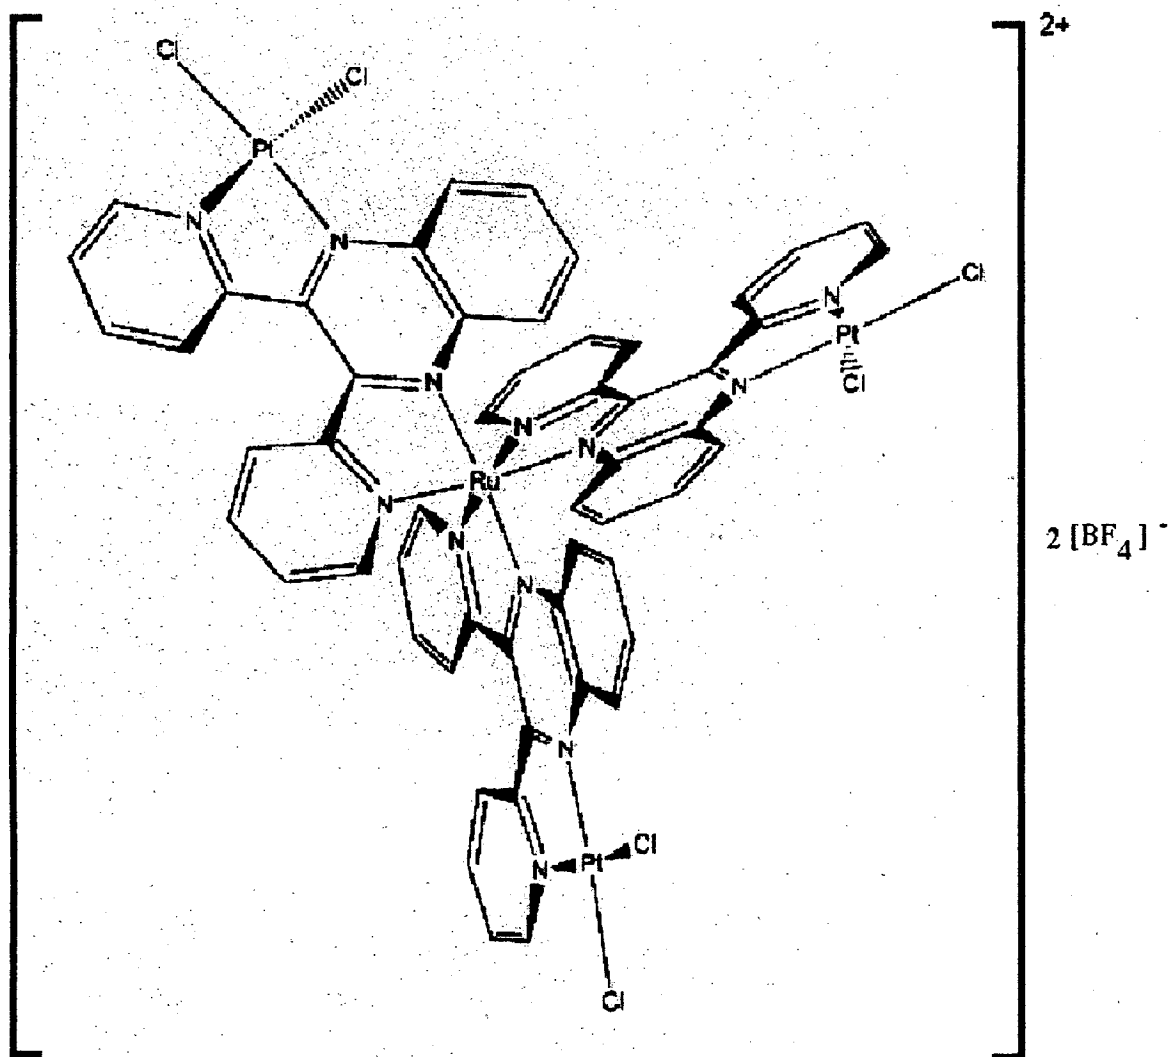

Figure 1. A drawing of the molecular structure of the precursor complex,  $[\text{Ru}(\text{dpq})_3(\text{PtCl}_2)_3](\text{BF}_4)_2$ , 1a.

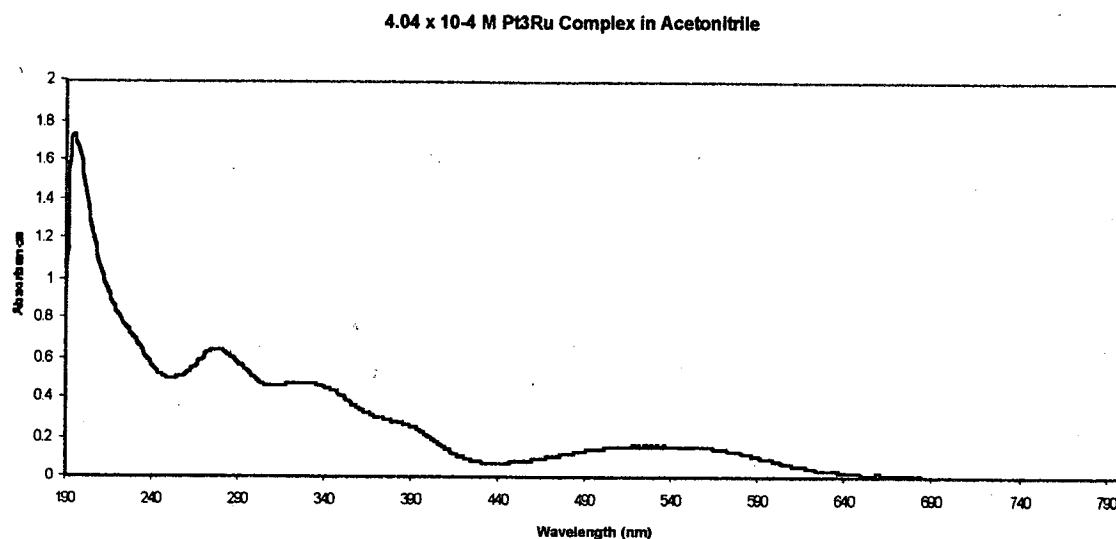

**Figure 2.** A UV-Vis absorption spectrum of a  $4.04 \times 10^{-4}$  M solution of the precursor complex,  $[\text{Ru}(\text{dpq})_3(\text{PtCl}_2)_3](\text{BF}_4)_2$ , **1a**, in acetonitrile, as recorded on a HP Agilent Model 8453 Photodiode Spectrophotometer with solvent subtraction.

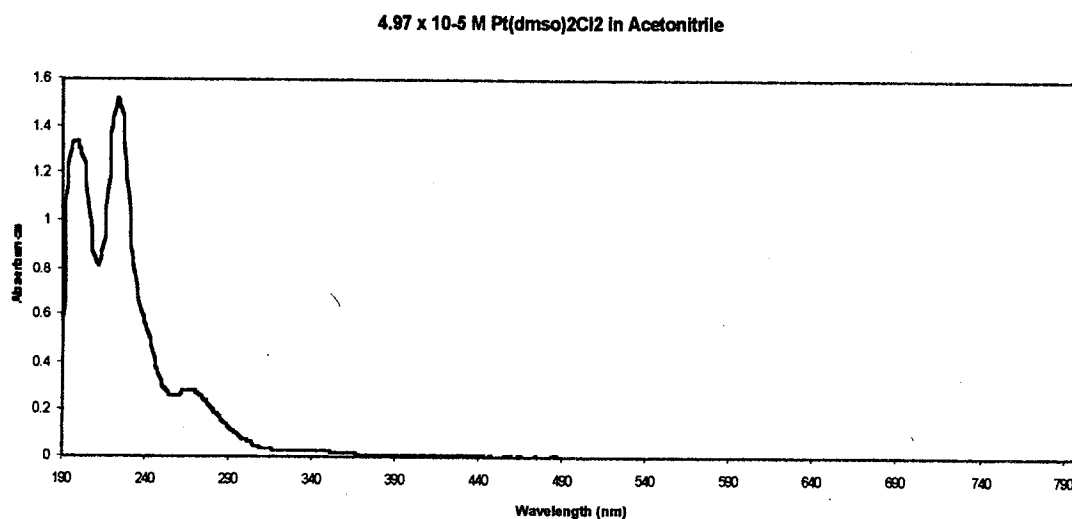

**Figure 3.** A UV-Vis absorption spectrum of a  $4.97 \times 10^{-5}$  M solution of the reagent complex,  $\text{Pt}(\text{DMSO})_2\text{Cl}_2$ , in acetonitrile, as recorded on a HP Agilent Model 8453 Photodiode Spectrophotometer with solvent subtraction.
